# Supplementary material for: Synthesis and encapsulation of an amphiphilic thermoresponsive star polymer with β-cyclodextrin and hyperbranched poly(oligo(ethylene glycol)methacrylate) as building blocks
Source: Royal Society of Chemistry journal article supplement (doi:10.1039/c4ra10407b), 2014-01-01
Supplement: c4ra10407b1.pdf [file c4ra10407b1.pdf]

**Synthesis and encapsulation of amphiphilic thermoresponsive star polymer  
with  $\beta$ -cyclodextrin and hyperbranched poly (oligo (ethylene glycol)  
methacrylate) as building blocks**

Yinwen Li <sup>a, b</sup>, Huilong Guo <sup>a, b</sup>, Jian Zheng <sup>a, b</sup>, Jianqun Gan <sup>a, b</sup>, Yan Zhang <sup>a, b</sup>, Xiaoxiao  
Guan <sup>a, b</sup>, Kun Wu <sup>a</sup>, Mangeng Lu <sup>a,\*</sup>

a Key Laboratory of Cellulose and Lignocellulosics Chemistry, Chinese Academy of  
Sciences; Key Laboratory of Polymer Materials for Electronics, Guangzhou institute of  
Chemistry, Chinese Academy of Sciences, Guangzhou 510650, PR China.

b University of Chinese Academy of Sciences, Beijing 100039, PR China

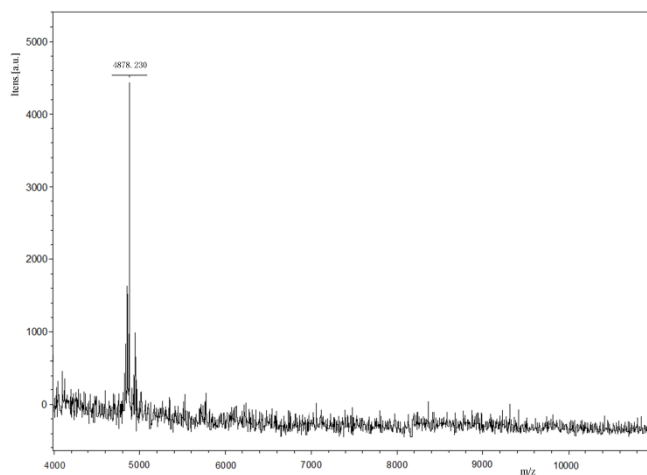

Fig. S1. MALDI-TOF spectrum of PE-CD.

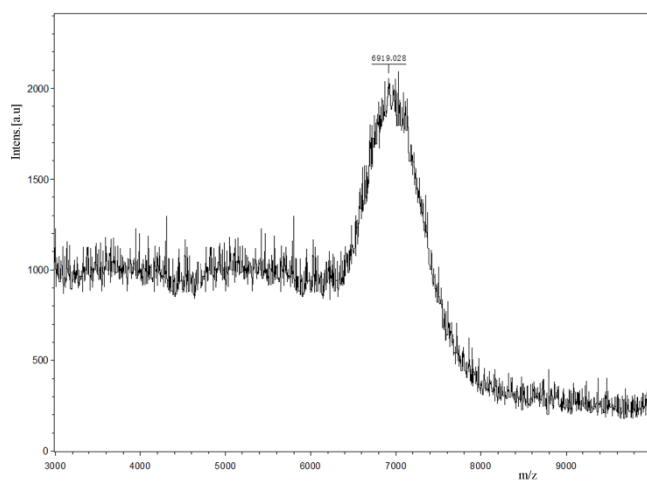

Fig. S2. MALDI-TOF spectrum of PE-CD-Br<sub>16</sub>.

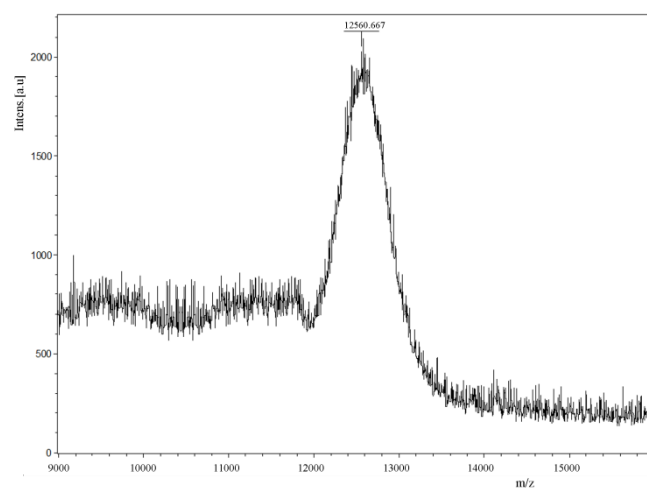

Fig. S3. MALDI-TOF spectrum of PE-CD-Br<sub>48</sub>.

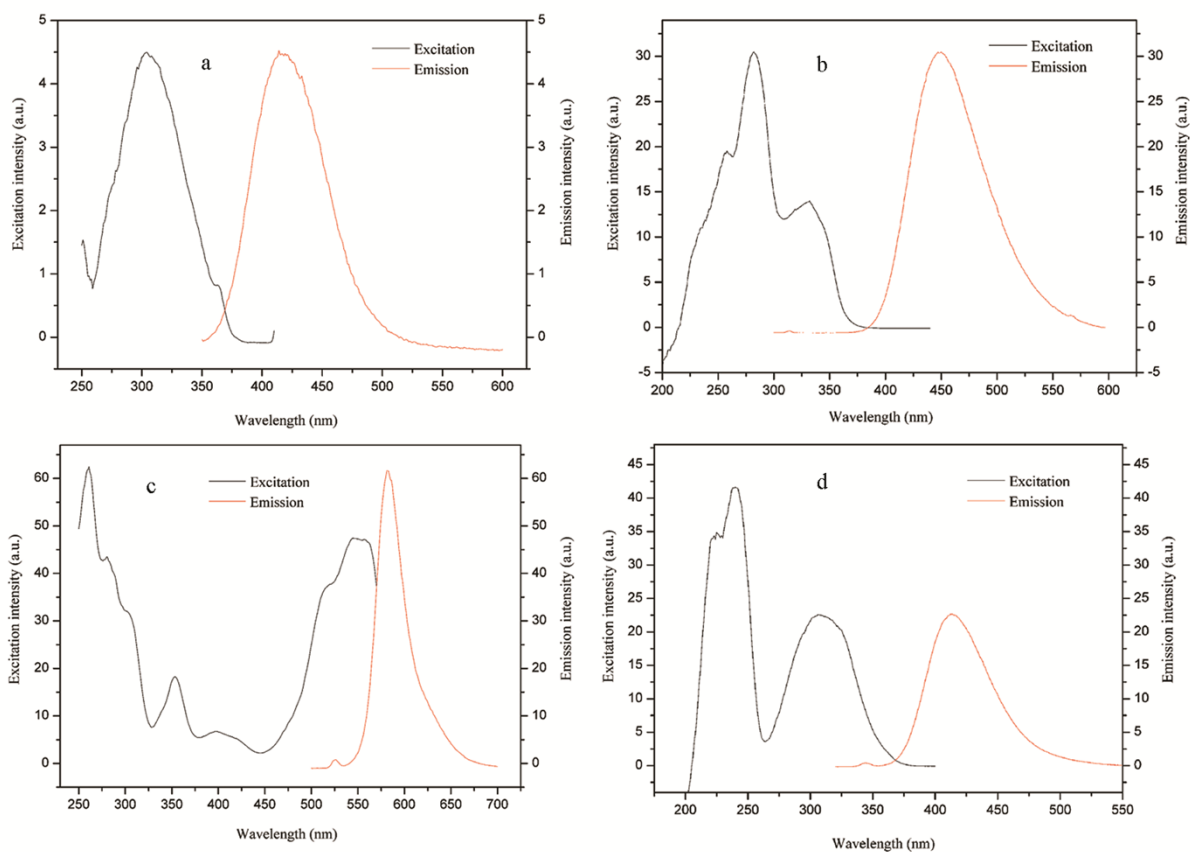

Fig. S4. Fluorescence excitation and emission spectra of RB, LL, Rh and CR in aqueous solution.

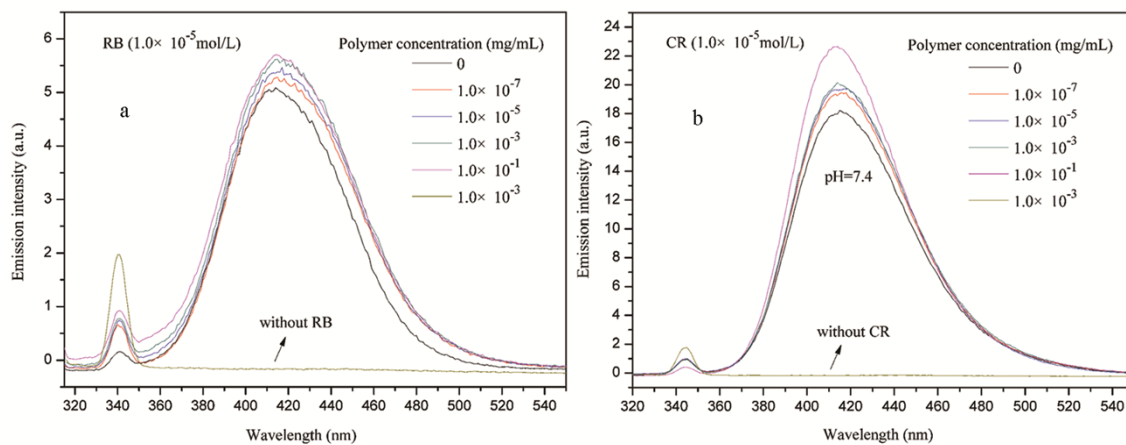

Fig. S5. Fluorescence emission spectra of RB, and CR solutions at pH= 7.4 in the presence of different  $P_2$  concentrations, separately.

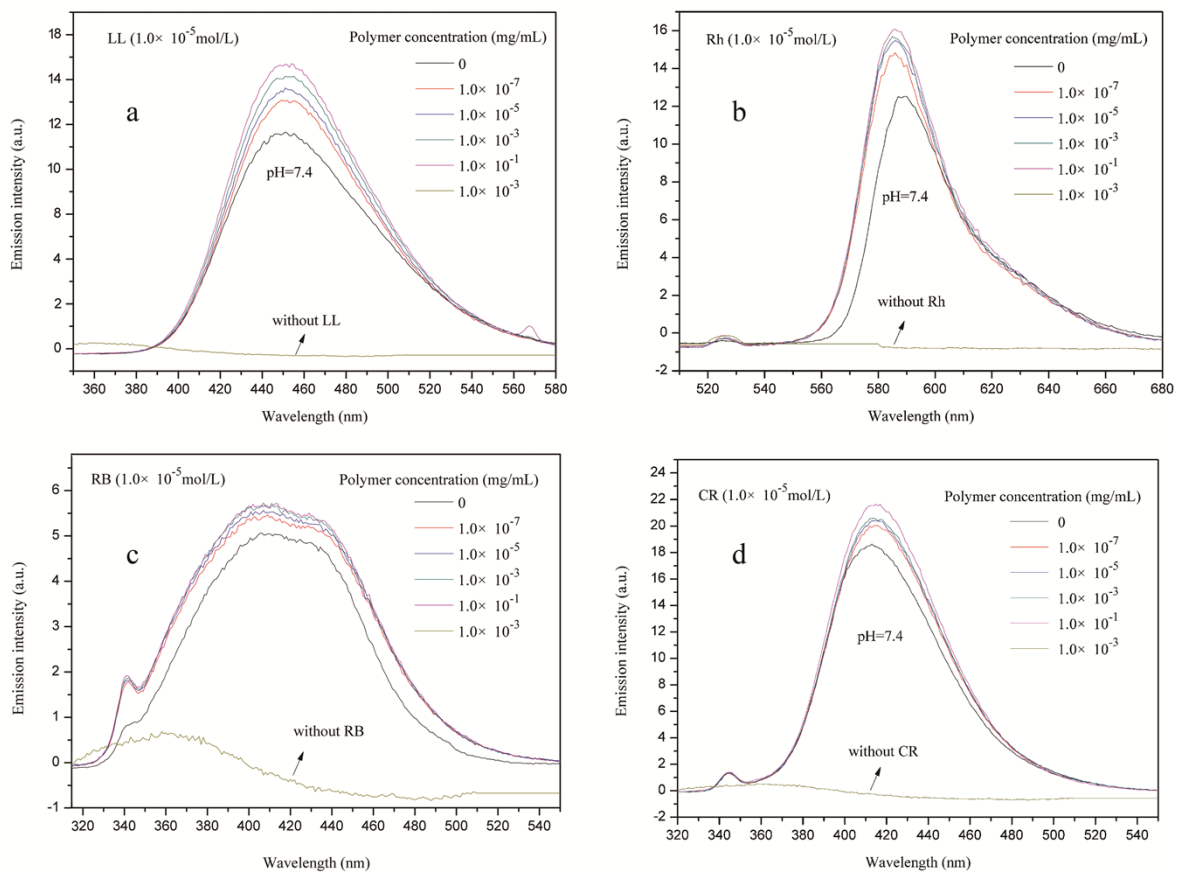

Fig. S6. Fluorescence emission spectra of LL, Rh, RB, and CR solutions at pH= 7.4 in the presence of different  $P_1$  concentrations, separately.

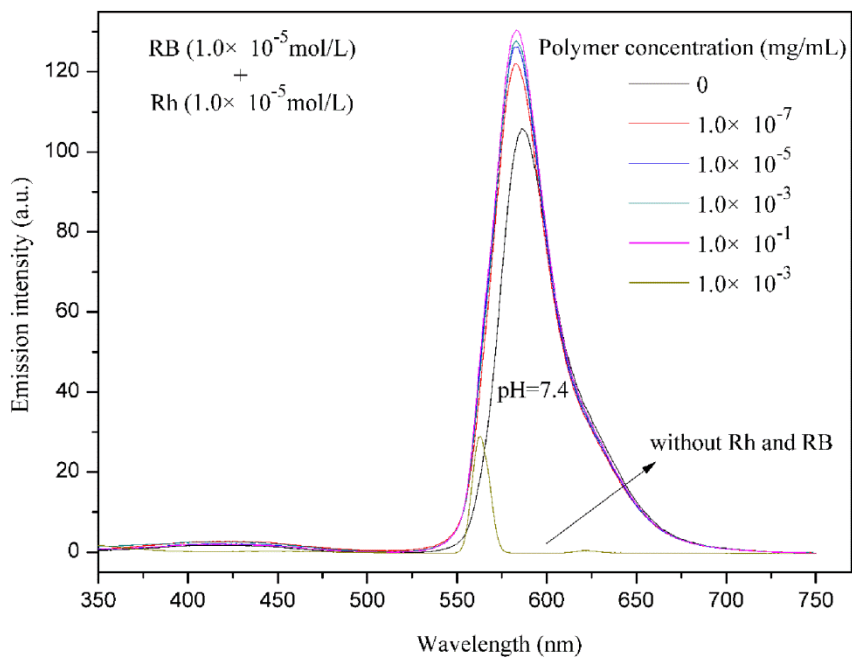

Figure. S7. Fluorescence emission spectra of RB+Rh at pH =7.4 in the presence of different  $P_2$  concentrations.

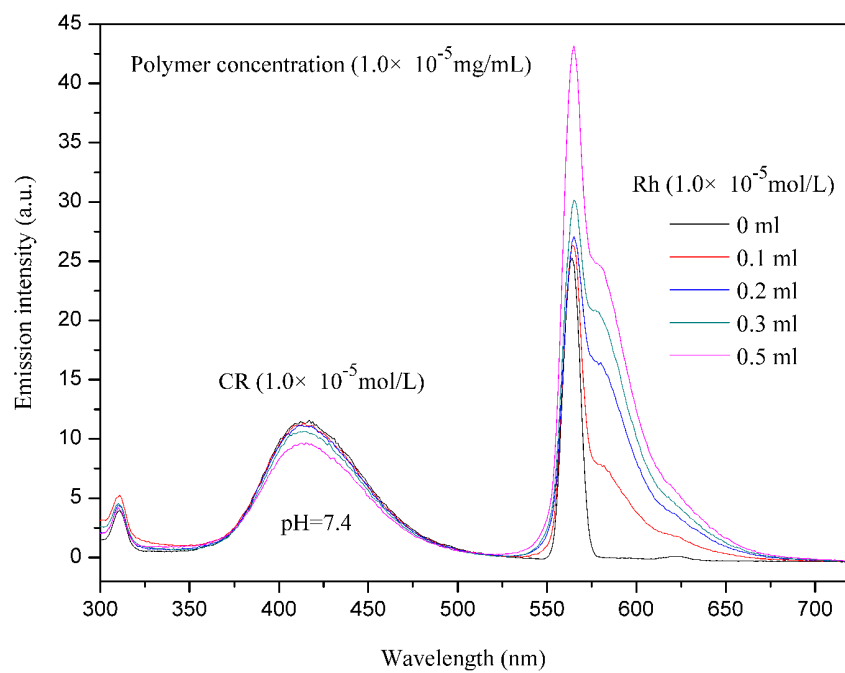

Figure. S8. Fluorescence emission spectra of CR +P<sub>2</sub> solutions with gradual adding of Rh solutions at pH = 7.4, respectively.

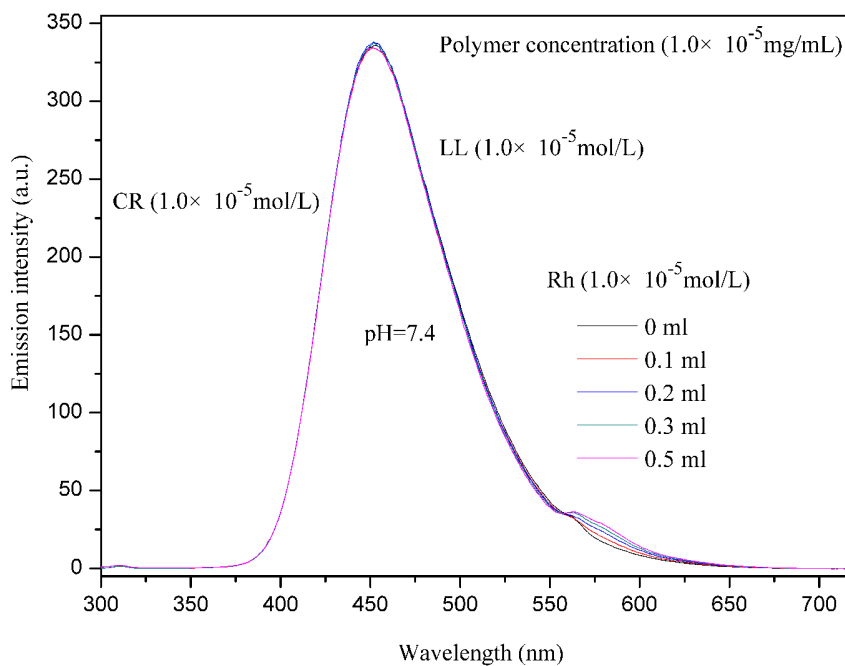

Figure. S9. Fluorescence emission spectra of CR+LL+P<sub>2</sub> solutions with gradual adding of Rh solutions at pH = 7.4, respectively.
